# Supplementary material
Source: Research Square preprint supplement (doi:10.21203/rs.3.rs-9246758/v1)
Supplement: Supplementary file 1 [file 682096fcf3aa8e2c9392869c.docx]

**Appendix:**

Table A

*Correlation matrix of explanatory variables utilized in panel field data analysis*

| WEALTH | INCOME | INTEREST_SA | INCOME_TAX | INFLATION |  |
| --- | --- | --- | --- | --- | --- |
| 1,0000 | 0,2730 | 0,0611 | -0,0537 | 0,0286 | WEALTH |
|  | 1,000 | 0,0436 | -0,0521 | 0,0455 | INCOME |
|  |  | 1,000 | -0,6117 | 0,7715 | INTEREST_SA |
|  |  |  | 1,000 | -0,7168 | INCOME_TAX |
|  |  |  |  | 1,0000 | INFLATION |
|  |  |  |  |  |  |
|  |  | tGDP | DEF_G | PUBLIC_DEBT |  |
|  |  | -0,0267 | -0,0419 | 0,0383 | WEALTH |
|  |  | -0,0061 | -0,0241 | 0,0421 | INCOME |
|  |  | -0,1235 | -0,1850 | 0,5746 | INTEREST_SA |
|  |  | -0,0473 | 0,4068 | -0,8032 | INCOME_TAX |
|  |  | 0,0389 | -0,2260 | 0,6370 | INFLATION |
|  |  | 1,0000 | 0,5543 | -0,1680 | tGDP |
|  |  |  | 1,0000 | -0,5120 | DEF_G |
|  |  |  |  | 1,0000 | PUBLIC_DEBT |
|  |  |  |  |  |  |
|  |  |  |  |  |  |

Note: Correlation coefficients, with utilization of the following observation 1:01 - 28883:28. Two-tailed critical values for n = 808724: 5% 0,0022, 1% 0,0029

Source: Own Elaboration, (2025).

Table B

*Zero-order effects models of variables explaining consumption from category personal effects*

|  | Personal Effects | |
| --- | --- | --- |
|  | (1) | (2) |
| WEALTH | −0,01278***  (−4,384) |  |
| INCOME |  | 0,6437***  (138,5) |
| Constant | 238,482***  (233,2) | 69,6156***  (58,64) |
| FE CLIENTS | A | A |
| Observation | 612 780 | 612 780 |
| F-test | F (1, 21885) = 19,2213 p<0,001 | F (1, 21885) = 19172,8 p<0,001 |
| Adj. R2 | 0,31 | 0,36 |

Note: T-statistics are provided in parentheses. Significance levels. *** p <0,01; ** p <0,05; * p <0,1.

Source: Own Elaboration, (2025).

Table C

*Zero-order effects models of variables explaining consumption from category „Macroeconomic effects“*

|  | Macroeconomic Effects | | | | | | | | | | |
| --- | --- | --- | --- | --- | --- | --- | --- | --- | --- | --- | --- |
|  | (3) | | (4) | | (5) | | (6) | | (7) | | (8) |
| INTEREST_SA | 17,9053***  (72,69) |  | |  | |  | |  | |  | |
| INCOME_TAX |  | -18,6784***  (-79,73) | |  | |  | |  | |  | |
| INFLATION |  |  | | 6,67577***  (74,84) | |  | |  | |  | |
| tGDP |  |  | |  | | -0,35045***  (-3,646) | |  | |  | |
| DEF_G |  |  | |  | |  | | -4,26916***  (-39,97) | |  | |
| PUBLIC_DEBT |  |  | |  | |  | |  | | 6,63009***  (68,98) | |
| Constant | 201,322***  (447,8) | 556,869***  (137,9) | | 195,637***  (381,6) | | 234,288***  (2954) | | 224,168***  (911,4) | | -25,6408***  (-6,812) | |
| FE Clients | A | A | | A | | A | | A | | A | |
| Observation | 612 780 | 612 780 | | 612 780 | | 612 780 | | 612 780 | | 612 780 | |
| F-test | F (1, 21884) = 5284,04 p<0,001 | F (1, 21884) = 6389,2 p<0,001 | | F (1, 21884) = 5600,45 p<0,001 | | F (1, 21884) = 13,2898 p<0,001 | | F (1, 21884) = 35,7554  p <0,001 | | F (1, 21884) = 4758,72 p<0,001 | |
| Adj. R2 | 0,32 | 0,33 | | 0,32 | | 0,31 | | 0,31 | | 0,32 | |

Notes: T-statistics are provided in parentheses. Significance levels. *** p <0,01; ** p <0,05; * p <0,1.

Source: Own Elaboration, (2025).

Table D

*Zero-order effects models of variables for both categories in comparison with the complete model*

|  | (9) | | (10) | | (11) | |
| --- | --- | --- | --- | --- | --- | --- |
| WEALTH | -0,116532*** | (-37,97) |  |  | −0,12477*** | (−39,39) |
| INCOME | 0,686201*** | (148,3) |  |  | 0,67239*** | (143,2) |
| INTEREST_SA |  |  | 6,37597*** | (18,69) | 0,29839 | (0,7174) |
| INCOME_TAX |  |  | -16,7539*** | (-41,67) | −6,12487*** | (-16,15) |
| INFLATION |  |  | 1,51548*** | (11,92) | −0,73531*** | (−5,886) |
| tGDP |  |  | -1,18826*** | (-8,308) | 1,00986*** | (6,300) |
| DEF_G |  |  | 0,284959** | (2,084) | 0,042745 | (0,3914) |
| PUBLIC_DEBT |  |  | -2,11864*** | (-14,23) | 0,042745*** | (−22,88) |
| COVID |  |  |  |  | 24,7801*** | (16,20) |
| WAR |  |  |  |  | 53,0186*** | (19,92) |
| Constant | 99,6820*** | (78,18) | 587,862*** | (49,18) | 300,522*** | (30,44) |
| FE Clients | A | | A | | A | |
| Observation | 612 780  F(2, 21884) = 11143,5  p<0,001  0,57 | | 612 780  F(6, 21884) = 1157,28  p<0,001  0,33 | | 612 780  F(10, 21844) = 3858,41 p<0,001  0,58 | |
| F-test |
| Adj. R2 |

Notes: T-statistics are provided in parentheses. Significance levels. *** p <0,01; ** p <0,05; * p <0,1.

Source: Own Elaboration, (2025).

Table E

*Hausman test and its coefficients. Includes 21,885 cross-sectional units, time series length = 28*

|  | Random Effects (GLS) | |
| --- | --- | --- |
| WEALTH | −0,08598*** | (−8,655) |
| INCOME | 0,88248*** | (39,45) |
| INTEREST_SA | −0,54704*** | (−5,556) |
| INCOME_TAX | −6,95539*** | (−7,157) |
| INFLATION | −12,3821 | (−0,340) |
| tGDP | 0,69657* | (1,696) |
| DEF_G | −0,19932 | (−0,762) |
| PUBLIC_DEBT | −0,40042*** | (−14,47) |
| COVID | 24,6892*** | (5,565) |
| WAR | 62,7007*** | (8,531) |
| Constant | 316,443*** | (12,40) |
| Adjusted R2 | 0,5812 |  |
| Hausman test: Asymptotic test statistic: Chi-square (2) = 5099,41 with p-value (0,000) | | |

Notes: The dependent variable is observed consumption. T-statistics are provided in parentheses. Significance levels. *** p <0,01; ** p <0,05; * p <0,1.

Source: Own Elaboration, (2025).
